# Supplementary material for: Insights into Conformational Dynamics and Allostery in DNMT1-H3Ub/USP7 Interactions
Source: MDPI journal article supplement (doi:10.3390/molecules26175153), 2021-08-25
Supplement: s1 [file s1]

## Supporting Information

### Insights into Conformational Dynamics and Allostery in DNMT1–H3Ub/USP7 Interactions

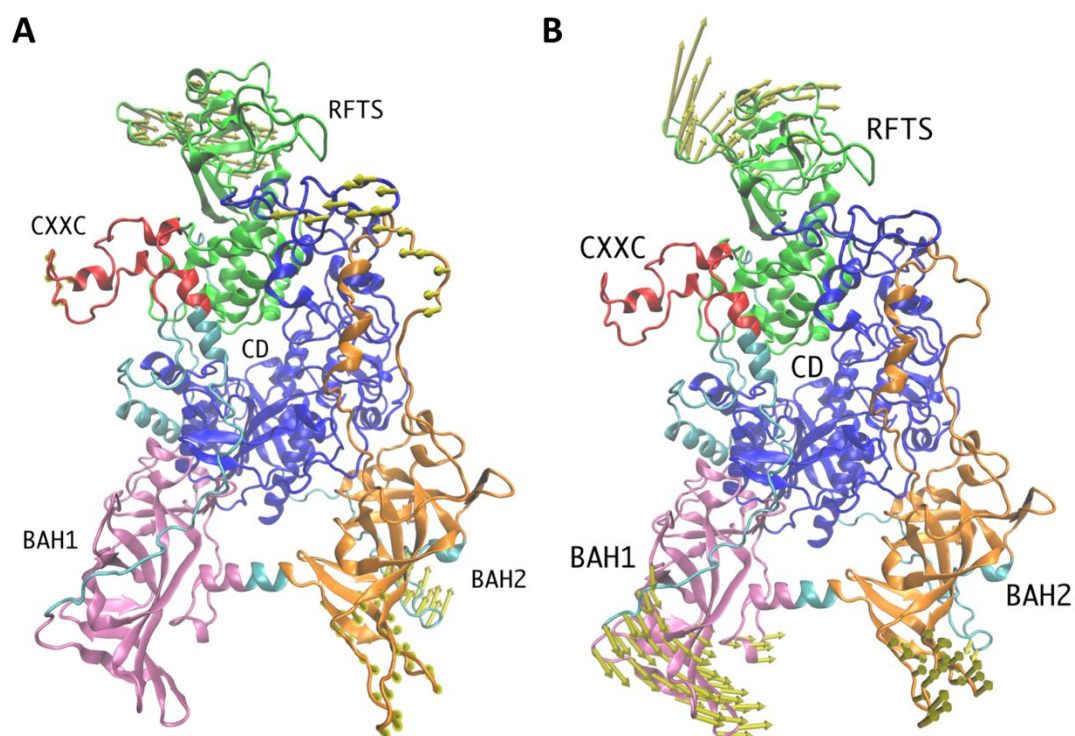

**Figure S1.** The motions of (A) the first and (B) the third ANM modes for the Apo-DNMT1.

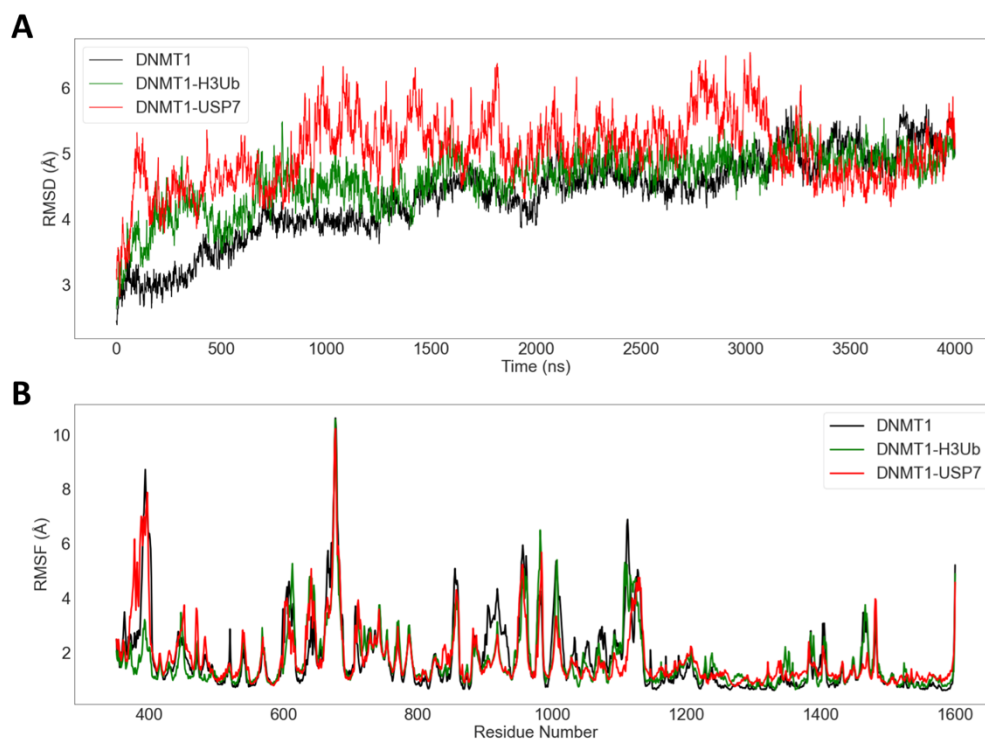

**Figure S2.** Conformation dynamics of DNMT1 in three different states. The comparison of the (A) RMSDs and (B) RMSFs for Apo-DNMT1 (black lines), H3UB-bound (green lines), and USP7-bound (red lines) states.

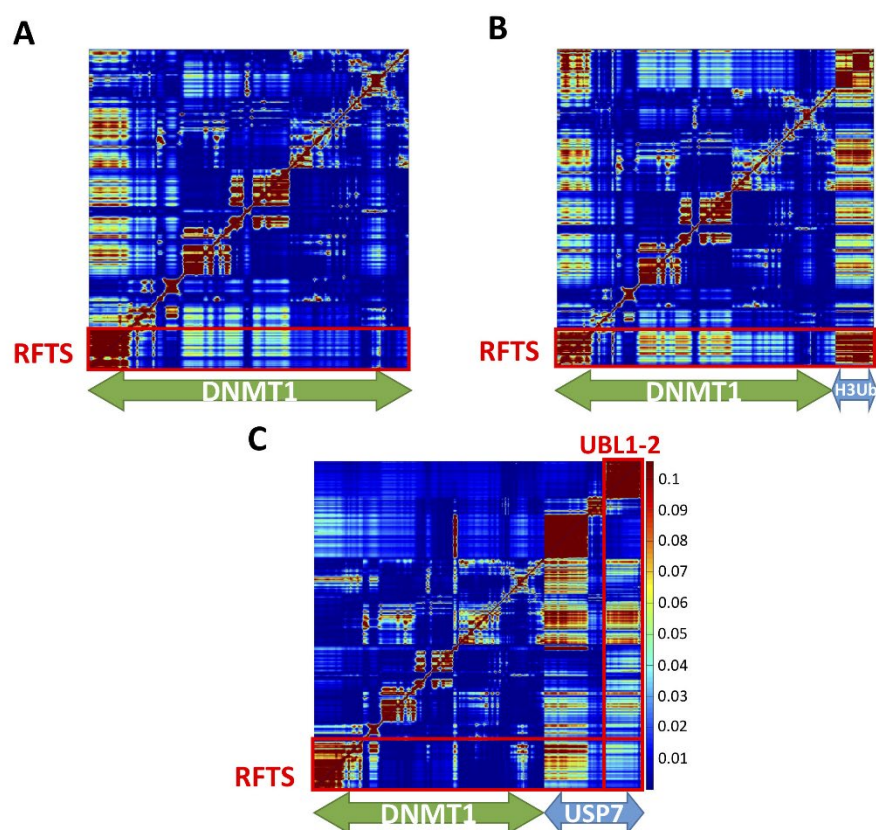

**Figure S3.** PRS maps for (A) Apo-DNMT1, (B) DNMT1-H3Ub, and (C) DNMT1-USP complexes. Regions marked by red rectangles highlight that RFTS domain in DNMT1 and UBL1-2 domain in USP7 has the most allosteric propensities.

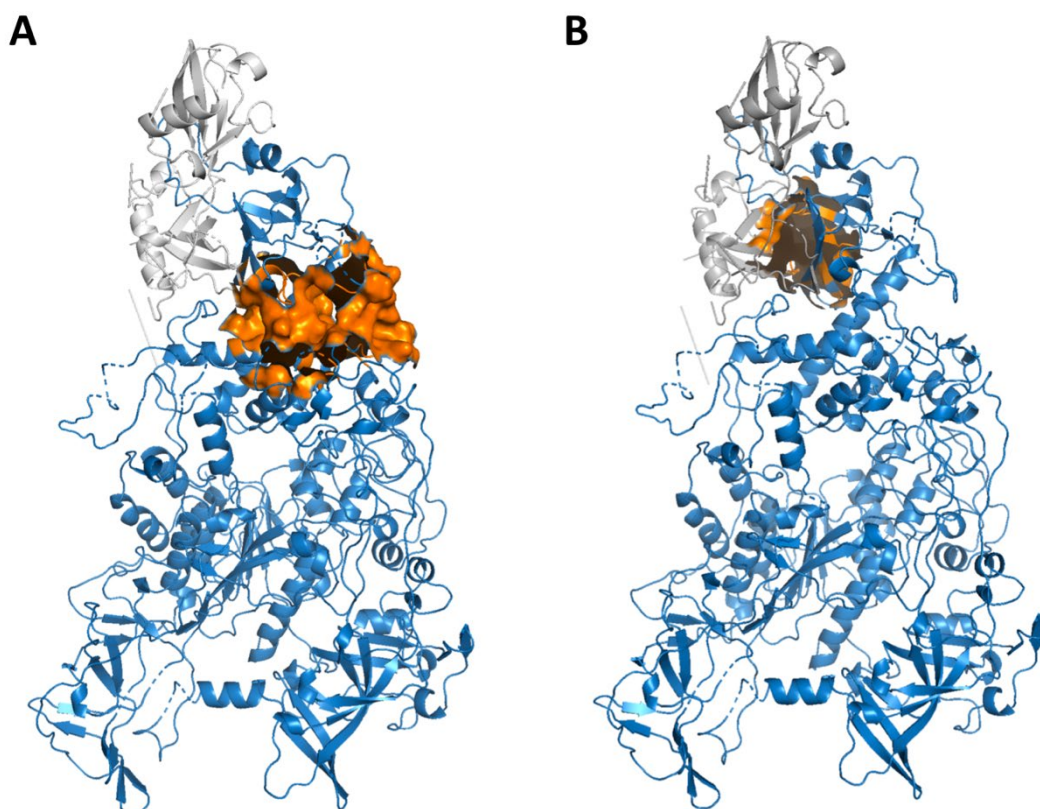

**Figure S4.** (A) The pocket 1 and (B) the pocket 5 for the DNMT1-H3Ub.

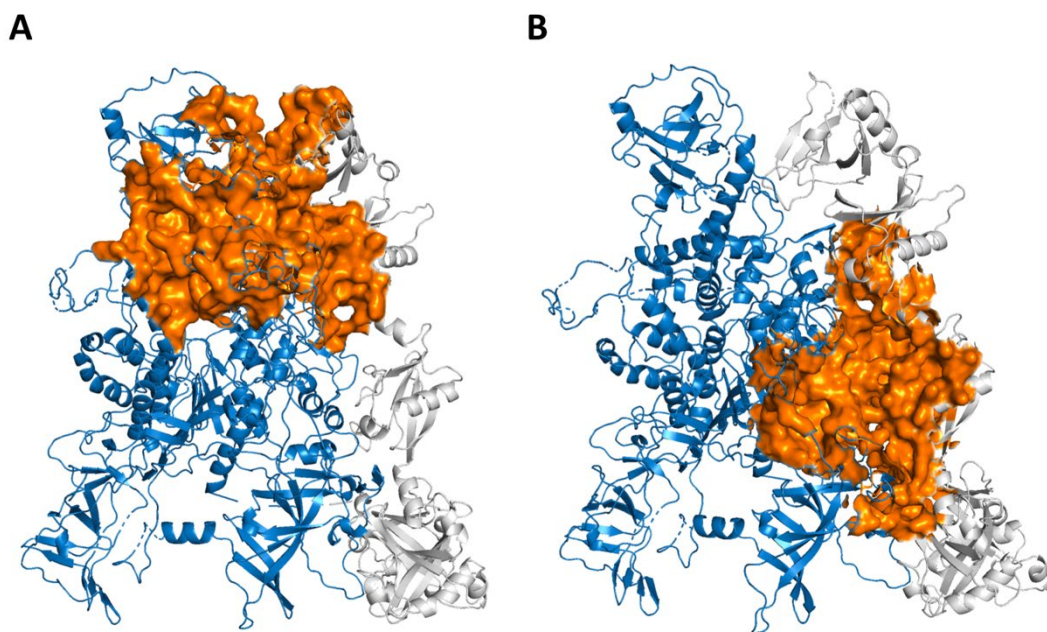

**Figure S5.** (A) The pocket 1 and (B) the pocket 2 for the DNMT1-USP7.

**Table S1.** The studied disease mutations in DNMT1.

| Mutations in diseases                                                                                               | Diseases                                                                                           |
|---------------------------------------------------------------------------------------------------------------------|----------------------------------------------------------------------------------------------------|
| Cys353Phe, Thr481Pro, Asp490Glu,<br>Pro491Tyr/Leu/Arg, Tyr495Cys/His, Lys505del,<br>Tyr524Asp, Ile531Asn, His553Arg | hereditary sensory and autonomic<br>neuropathy with dementia and hearing<br>loss type IE (HSAN IE) |
| Ala554Val, Cys580Arg, Gly589Ala, Val590Phe                                                                          | autosomal dominant cerebellar ataxia,<br>deafness and narcolepsy (ADCA-DN)                         |

**Table S2.** The studied PTM sites in DNMT1.

| Residue | Domain    | PTM Type                |
|---------|-----------|-------------------------|
| Lys366  | RFTS      | Acetylation             |
| Lys675  | CXXC      | Ubiquitylation          |
| Ser714  | linker    | Phosphorylation         |
| Lys739  | BAH1      | Sumoylation             |
| Lys749  | BAH1      | Sumoylation             |
| Lys891  | BAH1      | Acetylation             |
| Lys957  | BAH2      | Acetylation/Sumoylation |
| Lys961  | BAH2      | Acetylation             |
| Lys975  | BAH2      | Acetylation             |
| Lys1054 | BAH2      | Acetylation             |
| Lys1111 | KG repeat | Acetylation             |
| Lys1113 | KG repeat | Acetylation             |
| Lys1115 | KG repeat | Acetylation             |
| Lys1117 | KG repeat | Acetylation             |
| Lys1135 | KG repeat | Sumoylation             |
| Lys1349 | CD        | Acetylation             |
| Lys1415 | CD        | Acetylation             |

**Table S4.** The allosteric binding properties, scoring functions and constituting residues for detected allosteric sites in DNMT1- H3Ub.

| Allosteric Pockets | Pocket Volume (Å <sup>3</sup> ) | Total SASA (Å <sup>2</sup> ) | Druggability Score | Residues                                                                                                                                                                                                                                                                                                                                                                         |
|--------------------|---------------------------------|------------------------------|--------------------|----------------------------------------------------------------------------------------------------------------------------------------------------------------------------------------------------------------------------------------------------------------------------------------------------------------------------------------------------------------------------------|
| 1                  | 3052.184                        | 1483.075                     | 0.189              | A.351、A.356、A.357、A.358、A.359、A.361、A.362、A.363、A.364、A.365、A.366、A.418、A.419、A.421、A.422、A.423、A.424、A.425、A.426、A.427、A.428、A.464、A.494、A.497、A.498、A.501、A.505、A.551、A.552、A.553、A.554、A.555、A.556、A.559、A.588、A.589、A.590、A.1443、A.1451、A.1453、A.1454、A.1455、A.1456、A.1458、A.1475、A.1476、A.1485、A.1486、A.1487、A.1488、A.1489、A.1490、A.1491、A.1492、A.1493、A.1494、A.1498、A.1502 |
|                    |                                 |                              |                    | D.12、D.13                                                                                                                                                                                                                                                                                                                                                                        |
| 2                  | 3232.796                        | 1387.347                     | 0.079              | A.515、A.518、A.519、A.520、A.521、A.522、A.523、A.524、A.525、A.526、A.528、A.529、A.531、A.532、A.533、A.543、A.544、A.545、A.546、A.547、A.548、A.549、A.552、A.1227、A.1413、A.1414、A.1415、A.1416、A.1417、A.1418、A.1419、A.1420、A.1421、A.1446、A.1448、A.1450、A.1451、A.1452、A.1493、A.1514、A.1528、A.1529、A.1530、A.1531、A.1532、A.1533、A.1534、A.1547、A.1548、A.1550、A.1568、A.1569、A.1570、A.1571、A.1573、A.1574 |
| 3                  | 771.148                         | 356.515                      | 0.286              | A.466、A.467、A.468、A.469、A.506、A.509、A.510、A.513、A.556、A.560、A.564、A.599、A.601、A.602、A.603                                                                                                                                                                                                                                                                                        |
|                    |                                 |                              |                    | D.10、D.11、D.12                                                                                                                                                                                                                                                                                                                                                                   |
| 4                  | 3761.004                        | 1485.373                     | 0.465              | A.378、A.380、A.381、A.382、A.383、A.384、A.386、A.387、A.388、A.390、A.391、A.392、A.393、A.394、A.395、A.396、A.397、A.400、A.401、A.402、A.403、A.404、A.435、A.439、A.442、A.457、A.459、A.481、A.483、A.484、A.485、A.486                                                                                                                                                                                  |
|                    |                                 |                              |                    | B.42、B.44、B.70、B.71、B.72、B.73、B.74                                                                                                                                                                                                                                                                                                                                               |

|   |         |         |       |                                                                                        |
|---|---------|---------|-------|----------------------------------------------------------------------------------------|
|   |         |         |       | C.6、C.7、C.8、C.10、C.12、C.13、C.30、C.35、C.36、C.37、C.40、C.44、C.49、C.68、C.69、C.70、C.71、C.73 |
| 5 | 846.021 | 399.205 | 0.375 | A.404、A.406、A.442、A.443、A.444、A.445、A.467、A.470、A.474、A.476、A.477、A.487、A.488、A.489    |
|   |         |         |       | B.6、B.7、B.8、B.9、B.10、B.44、B.68、B.69、B.70、B.71、B.73                                     |

**Table S5.** The allosteric binding properties, scoring functions and constituting residues for detected allosteric sites in DNMT1- USP7.

| Allosteric Pockets | Pocket Volume (Å <sup>3</sup> ) | Total SASA (Å <sup>2</sup> ) | Druggability Score | Residues                                                                                                                                                                                                                                                                                                                                                                                                                                                                                                                                                                                                                                                                                                                                                                                                                                                                                                                                                                                                                                                                                                                   |
|--------------------|---------------------------------|------------------------------|--------------------|----------------------------------------------------------------------------------------------------------------------------------------------------------------------------------------------------------------------------------------------------------------------------------------------------------------------------------------------------------------------------------------------------------------------------------------------------------------------------------------------------------------------------------------------------------------------------------------------------------------------------------------------------------------------------------------------------------------------------------------------------------------------------------------------------------------------------------------------------------------------------------------------------------------------------------------------------------------------------------------------------------------------------------------------------------------------------------------------------------------------------|
| 1                  | 13279.57                        | 7053.9                       | 0.103              | A.352、A.356、A.357、A.358、A.359、A.361、A.362、A.363、A.364、A.365、A.366、A.367、A.368、A.369、A.370、A.371、A.409、A.410、A.411、A.412、A.413、A.417、A.419、A.420、A.421、A.422、A.423、A.424、A.425、A.426、A.427、A.428、A.429、A.430、A.436、A.456、A.457、A.462、A.463、A.464、A.465、A.477、A.488、A.492、A.493、A.494、A.495、A.496、A.497、A.498、A.499、A.500、A.501、A.502、A.504、A.505、A.528、A.531、A.532、A.536、A.539、A.540、A.541、A.542、A.543、A.544、A.545、A.546、A.547、A.548、A.549、A.550、A.552、A.553、A.555、A.556、A.558、A.559、A.562、A.585、A.586、A.589、A.590、A.591、A.592、A.593、A.594、A.595、A.596、A.597、A.598、A.599、A.600、A.653、A.655、A.656、A.657、A.660、A.693、A.696、A.697、A.700、A.966、A.967、A.970、A.971、A.973、A.974、A.1376、A.1377、A.1378、A.1379、A.1415、A.1416、A.1417、A.1418、A.1419、A.1420、A.1421、A.1422、A.1423、A.1424、A.1425、A.1426、A.1427、A.1430、A.1441、A.1443、A.1444、A.1445、A.1446、A.1447、A.1448、A.1449、A.1450、A.1451、A.1453、A.1454、A.1455、A.1456、A.1457、A.1459、A.1460、A.1461、A.1462、A.1463、A.1464、A.1467、A.1469、A.1471、A.1472、A.1473、A.1474、A.1475、A.1476、A.1477、A.1478、A.1479、A.1481、A.1482、A.1483、A.1484、A.1485、A.1486、A.1487、A.1488、A.1489、A.1490、A.1491、A.1492、 |



|   |           |          |       |                                                                                                                                                                                                                                                                                                                                                                                                                                                                                                                                                                                                                                                                                                                                                                                                                                                                                                                                                                                                                                                                                                                                                                                                                                                                                                                            |
|---|-----------|----------|-------|----------------------------------------------------------------------------------------------------------------------------------------------------------------------------------------------------------------------------------------------------------------------------------------------------------------------------------------------------------------------------------------------------------------------------------------------------------------------------------------------------------------------------------------------------------------------------------------------------------------------------------------------------------------------------------------------------------------------------------------------------------------------------------------------------------------------------------------------------------------------------------------------------------------------------------------------------------------------------------------------------------------------------------------------------------------------------------------------------------------------------------------------------------------------------------------------------------------------------------------------------------------------------------------------------------------------------|
|   |           |          |       | <p>A.1493、A.1494、A.1501、A.1502、A.1503、A.1505、A.1506、A.1507、A.1514、A.1531、A.1532、A.1533、A.1543、A.1544、A.1545、A.1546</p> <p>B.892、B.914、B.915、B.916、B.943、B.945、B.946、B.948、B.950、B.951、B.952、B.953、B.954、B.956、B.957、B.958、B.959、B.960、B.961、B.962、B.963、B.967、B.968、B.999、B.1000、B.1002、B.1016、B.1017、B.1018、B.1021、B.1038、B.1039、B.1040、B.1042、B.1043、B.1044、B.1045、B.1046、B.1047、B.1048、B.1049、B.1050、B.1051、B.1052、B.1053、B.1055、B.1056、B.1057、B.1058、B.1059、B.1061、B.1062、B.1063、B.1065、B.1066、B.1067、B.1068、B.1069、B.1070、B.1071、B.1072、B.1073、B.1074、B.1075、B.1076</p>                                                                                                                                                                                                                                                                                                                                                                                                                                                                                                                                                                                                                                                                                                                                               |
| 2 | 13955.021 | 6901.137 | 0.137 | <p>A.954、A.955、A.956、A.957、A.980、A.981、A.982、A.983、A.984、A.985、A.986、A.987、A.988、A.989、A.990、A.1023、A.1024、A.1025、A.1026、A.1027、A.1029、A.1031、A.1032、A.1033、A.1034、A.1035、A.1036、A.1037、A.1038、A.1039、A.1040、A.1041、A.1043、A.1044、A.1045、A.1046、A.1064、A.1065、A.1066、A.1071、A.1072、A.1073、A.1074、A.1076、A.1077、A.1078、A.1079、A.1080、A.1082、A.1084、A.1086、A.1087、A.1088、A.1089、A.1090、A.1096、A.1097、A.1098、A.1099、A.1100、A.1101、A.1104、A.1131、A.1132、A.1133、A.1156、A.1157、A.1158、A.1159、A.1304、A.1305、A.1309、A.1331、A.1332、A.1333、A.1335、A.1362、A.1363、A.1364、A.1365、A.1366、A.1368、A.1369、A.1372、A.1373、A.1374、A.1375、A.1376、A.1377、A.1378、A.1381、A.1382、A.1383、A.1386、A.1387、A.1388、A.1389、A.1390、A.1391、A.1392、A.1393、A.1394、A.1395、A.1396、A.1398、A.1399、A.1400、A.1401、A.1402、A.1403、A.1404、A.1405、A.1406、A.1408、A.1409、A.1410、A.1432、A.1517、A.1518、A.1519、A.1520、A.1521、A.1522、A.1523、A.1524、A.1525、A.1538、A.1543、A.1544、A.1551、A.1558、A.1560、A.1561、A.1562、A.1564、A.1582、A.1583、A.1586、A.1587、A.1590、A.1593</p> <p>B.581、B.737、B.739、B.741、B.742、B.743、B.784、B.787、B.788、B.791、B.792、B.794、B.796、B.815、B.816、B.818、B.819、B.820、B.823、B.824、B.833、B.834、B.835、B.837、B.838、B.839、B.841、B.842、B.843、B.844、B.845、B.846、B.847、B.848、B.851、B.852、B.853、B.854、B.855、B.856、B.857、B.858、B.859、B.860、B.862、B.863、B.864、B.865、</p> |

|   |          |          |       |                                                                                                                                                                                                                                                                                                                                           |
|---|----------|----------|-------|-------------------------------------------------------------------------------------------------------------------------------------------------------------------------------------------------------------------------------------------------------------------------------------------------------------------------------------------|
|   |          |          |       | B.866、B.867、B.868、B.869、B.870、B.872、B.873、B.874、B.875、B.876、B.877、B.885、B.886、B.888、B.889、B.891、B.892、B.893、B.894、B.895、B.896、B.897、B.907、B.911、B.912、B.913、B.914、B.959、B.964、B.965、B.966、B.968、B.969、B.970                                                                                                                               |
| 3 | 3064.893 | 1318.425 | 0.017 | A.525、A.526、A.529、A.532、A.533、A.544、A.1145、A.1147、A.1167、A.1168、A.1169、A.1170、A.1172、A.1173、A.1188、A.1189、A.1190、A.1191、A.1223、A.1224、A.1225、A.1247、A.1266、A.1267、A.1268、A.1269、A.1310、A.1311、A.1312、A.1380、A.1381、A.1382、A.1384、A.1413、A.1414、A.1415、A.1416、A.1525、A.1528、A.1529、A.1568、A.1569、A.1570、A.1571、A.1574、A.1575、A.1577、A.1578 |
|   |          |          |       | B.965、B.966、B.967                                                                                                                                                                                                                                                                                                                         |
